# Supplementary material for: Walking in the Era of Autonomous Vehicles
Source: MDPI journal article supplement (doi:10.3390/su141710509), 2022-08-23
Supplement: s1 [file s1]

Archive with 1 entries (1 files):
- sustainability-1841819-supplementary.pdf
