# Supplementary figures and images for: Walking in the Era of Autonomous Vehicles
Source: MDPI journal article supplement (doi:10.3390/su141710509), 2022-08-23

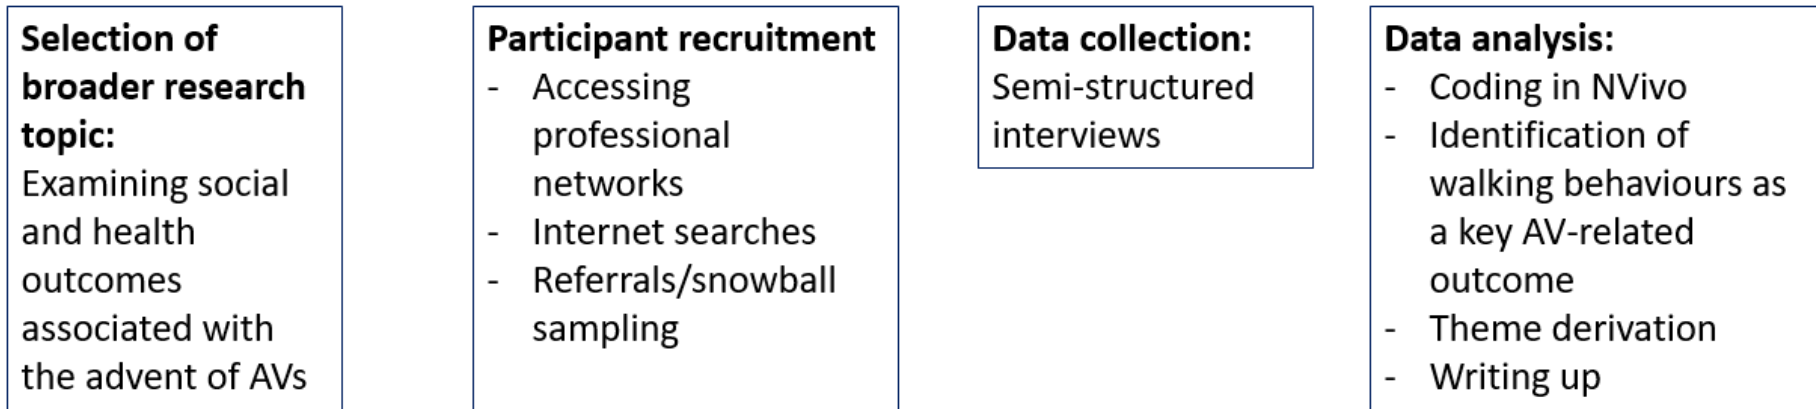

Supplementary Figure S1: The research process

Supplement: s1 [file s1 › sustainability-1841819-supplementary.pdf]
